# Supplementary material for: A novel chiral oxazoline copper(ii)-based complex inhibits ovarian cancer growthin vitroandin vivoby regulating VEGF/VEGFR2 downstream signaling pathways and apoptosis factors
Source: Royal Society of Chemistry journal article supplement (doi:10.1039/d3dt01648j), 2023-01-01
Supplement: d3dt01648j1.pdf [file d3dt01648j1.pdf]

## Electronic Supporting Information

### **A novel chiral oxazoline copper(II)-based complex inhibits ovarian cancer growth in vitro and vivo by regulating VEGF/VEGFR2 downstream signaling pathways and apoptosis factors**

Rong Fan <sup>#, a</sup>, Jing-chen Wei <sup>#, a</sup>, Bing-Bing Xu <sup>a</sup>, Nan Jin <sup>a</sup>, Xiao-Yi Gong <sup>a</sup>, Xiu-Ying Qin<sup>\*, a, b</sup>

#### **Instruments and materials**

**Materials.** All materials and solvents were purchased commercially and used without further purification unless specifically noted. Ultrapure Milli-Q water was used in all experiments. *L*-Methioninol was purchased from Sequoia precision Chemical Co., Ltd. 4-Hydroxyisophthalaldehyde was purchased from SAAN Chemical Technology Co., Ltd. Potassium hydroxide (A.R.), anhydrous ethanol (A.R.) and copper nitrate trihydrate (A.R.) were purchased from Xilong Science Co., Ltd. MTT, penicillin/streptomycin, and dimethylsulfoxide were purchased from Sigma-Aldrich, USA. Dulbecco's modified eagle medium (DMEM, Gibco), Fetal bovine serum (FBS, GEMINI), pancreatic enzyme (Gibco), cell culture plates (Corning) were used. Annexin V/PI apoptosis kit was purchased from BD Bioscience. The JC-1 mitochondrial membrane potential detection kit was from Beyotime (Shanghai, China). HUVECs and SKOV3 cell lines were purchased from Shanghai oulu biological technology Co, ltd. Cell culture: HUVECs were cultured in DMEM medium supplemented with FBS (10%), penicillin (100 µg/mL), and streptomycin (100 µg/mL); SKOV3 cells were cultured in DMEM medium supplemented with FBS (10%), penicillin (100 µg/mL), and streptomycin (100 µg/mL). They were incubated at 37°C in a humidified incubator with 5 % CO<sub>2</sub> and 95 % air, and the medium was changed thrice weekly. BALB/c nude mice were purchased from Hunan SJA Laboratory Animal Co., Ltd. Chin.

#### **Instruments.**

IR spectras were taken on a IRAffinity-1 FT-IR spectrometer with KBr pallets in the range of 4000~400 cm<sup>-1</sup>. The crystal structures were determined by a four-circle CCD diffractometer (XtaLAB Synergy, Dualflex, HyPix). Apoptosis assays, reactive oxygen species and mitochondrial membrane potential detections were determined by BD FACSCanto. The animal experiments were approved by the Experimental Animal Ethics Committee of Guilin Medical University (Giulin, China). Cells were cultured in a CO<sub>2</sub> incubator (170S, Galaxy, New Brunswick). Cells were observed with an inverted microscope (OLYMPUS CKX35, Japan).

## Supporting Tables

Table S1. Crystal data and structure refinement parameters for  $[\text{Cu}(\text{C}_{13}\text{H}_{14}\text{NO}_3\text{S})_2]_2$ .

| Parameters                                                   | $[\text{Cu}(\text{C}_{13}\text{H}_{14}\text{NO}_3\text{S})_2]_2$              |
|--------------------------------------------------------------|-------------------------------------------------------------------------------|
| Empirical formula                                            | $\text{C}_{52} \text{H}_{56} \text{Cu}_2 \text{N}_4 \text{O}_{12} \text{S}_4$ |
| Formula moiety                                               | $2(\text{C}_{26} \text{H}_{28} \text{Cu} \text{N}_2 \text{O}_6 \text{S}_2)$   |
| Formula weight                                               | 1184.32                                                                       |
| Temperature (K)                                              | 273(2)                                                                        |
| Radiation type                                               | Cu K $\alpha$                                                                 |
| Wavelength ( $\text{\AA}$ )                                  | 1.54184                                                                       |
| Crystal system, Space group                                  | Triclinic, $P1$                                                               |
| $a, b, c$ ( $\text{\AA}$ )                                   | 10.68048(15), 11.38830(10), 12.62996(13)                                      |
| $\alpha, \beta, \gamma$ ( $^\circ$ )                         | 72.3194(8), 67.0804(11), 84.0598(9)                                           |
| $V$ ( $\text{\AA}^3$ )                                       | 1347.91(3)                                                                    |
| $Z, D_{\text{Calcd}}$ ( $\text{Mg.m}^{-3}$ )                 | 1, 1.459                                                                      |
| Abs. coefficient ( $\text{mm}^{-1}$ )                        | 2.958                                                                         |
| $F(000)$                                                     | 614                                                                           |
| $\theta$ range for data collection / refinement ( $^\circ$ ) | 3.9470~77.2020 / 3.968 ~74.437                                                |
|                                                              | $-13 \leq h \leq 11$                                                          |
| Limiting indices                                             | $-14 \leq k \leq 13$                                                          |
|                                                              | $-15 \leq l \leq 15$                                                          |
| Reflections collected                                        | 42630                                                                         |
| Independent reflections ( $R_{\text{int}} = 0.035$ )         | 9946                                                                          |
| Observed data ( $I > 2\sigma(I)$ )                           | 9745                                                                          |
| Refinement method                                            | Full-matrix least-squares on $F^2$                                            |
| Nref / Npar / Nres                                           | 9946 / 690 / 34                                                               |
| $R[F^2 > 2\sigma(F^2)], wR(F^2), S$                          | 0.0878, 0.2431, 1.003                                                         |
|                                                              | $w = 1/[\sigma^2(F_o^2) + (0.2440P)^2 + 0.0250P]$                             |
|                                                              | where $P = (F_o^2 + 2F_c^2)/3$                                                |
| H-atom treatment                                             | H-atom parameters constrained                                                 |
| Shift max / mean                                             | 0.000 / 0.000                                                                 |
| Completeness to theta                                        | 0.999                                                                         |
| Absolute structure parameter*                                | -0.03(4)                                                                      |

\* Classical Flack method preferred over Parsons because s.u. lower.

Table S2. Selected bond distances (Å) and angles (°) for [Cu(C<sub>13</sub>H<sub>14</sub>NO<sub>3</sub>S)<sub>2</sub>]<sub>2</sub>.

| Bond             | Dist. (Å) | Bond             | Dist. (Å) |
|------------------|-----------|------------------|-----------|
| Cu1 — O1         | 1.902(6)  | Cu2 — O10        | 1.908(6)  |
| Cu1 — O4         | 1.912(6)  | Cu2 — O7         | 1.911(6)  |
| Cu1 — N2         | 1.965(6)  | Cu2 — N3         | 1.971(6)  |
| Cu1 — N1         | 1.969(6)  | Cu2 — N4         | 1.968(6)  |
| S1 — C12         | 1.811(10) | S1 — C13         | 1.754(17) |
| S2 — C25         | 1.808(13) | S2 — C26         | 1.80(3)   |
| S3 — C38         | 1.814(13) | S3 — C39         | 1.80(2)   |
| S4A — C51        | 2.23(2)   | S4A — C52A       | 1.98(4)   |
| S4B — C51        | 1.815(18) | S4B — C52B       | 1.79(6)   |
| C8 — O3          | 1.345(8)  | O2 — C5          | 1.186(14) |
| N1 — C8          | 1.289(9)  | C21 — N2         | 1.284(10) |
| N1 — C10         | 1.475(8)  | C21 — O6         | 1.337(10) |
| C9 — O3          | 1.443(10) | C22 — O6         | 1.482(12) |
| C9 — C10         | 1.520(10) | C23 — N2         | 1.491(11) |
| C34 — O9         | 1.348(9)  | C47 — O12        | 1.347(9)  |
| Angle            | (°)       | Angle            | (°)       |
| O1 — Cu1 — O4    | 174.3(3)  | O10 — Cu2 — O7   | 167.4(3)  |
| O1 — Cu1 — N2    | 88.4(3)   | O10 — Cu2 — N3   | 90.3(2)   |
| O1 — Cu1 — N1    | 91.5(2)   | O10 — Cu2 — N4   | 91.4(2)   |
| O4 — Cu1 — N2    | 91.8(3)   | O7 — Cu2 — N3    | 91.8(2)   |
| O4 — Cu1 — N1    | 89.2(2)   | O7 — Cu2 — N4    | 90.3(3)   |
| N2 — Cu1 — N1    | 171.2(3)  | N4 — Cu2 — N3    | 162.8(2)  |
| C13 — S1 — C12   | 100.1(7)  | C26 — S2 — C25   | 100.2(12) |
| C39 — S3 — C38   | 99.9(9)   | C52A — S4A — C51 | 84.3(12)  |
| C52B — S4B — C51 | 111.8(19) | O2 — C5 — C4     | 126.8(10) |
| N1 — C8 — C7     | 127.4(6)  | N2 — C21 — C20   | 126.9(7)  |
| N1 — C8 — O3     | 115.6(6)  | N2 — C21 — O6    | 116.3(7)  |
| O3 — C8 — C7     | 116.9(6)  | O6 — C21 — C20   | 116.7(7)  |
| N3 — C34 — C33   | 127.2(7)  | N4 — C47 — C46   | 127.3(6)  |
| N3 — C34 — O9    | 115.8(6)  | N4 — C47 — O12   | 116.6(6)  |
| C8 — N1 — C10    | 108.8(6)  | C21 — N2 — C23   | 108.1(6)  |
| C8 — O3 — C9     | 106.8(6)  | C21 — O6 — C22   | 106.6(6)  |
| O9 — C34 — C33   | 117.0(6)  | O12 — C47 — C46  | 116.1(6)  |

Table S3. Hydrogen bond lengths (Å), angles (°) for [Cu(C<sub>13</sub>H<sub>14</sub>NO<sub>3</sub>S)<sub>2</sub>]<sub>2</sub>.

| <i>D</i> —H... <i>A</i>      | <i>D</i> —H | H... <i>A</i> | <i>D</i> ... <i>A</i> | < <i>DHA</i> |
|------------------------------|-------------|---------------|-----------------------|--------------|
| C9—H9B... O5 <sup>i</sup>    | 0.97        | 2.59          | 3.441 (11)            | 146.6        |
| C5—H5... O9 <sup>i</sup>     | 0.93        | 2.63          | 3.497 (12)            | 156.2        |
| C37—H37B... S1 <sup>ii</sup> | 0.97        | 2.97          | 3.821(9)              | 146.9        |

|                               |      |      |            |       |
|-------------------------------|------|------|------------|-------|
| C24—H24A ... O1               | 0.97 | 2.55 | 3.136 (12) | 118.5 |
| C51—H51D ... S1 <sup>ii</sup> | 0.97 | 2.87 | 3.788(18)  | 158.5 |

Symmetry codes: (i) x, y, z-1; (ii) x, y+1, z.

## Supplementary Figures

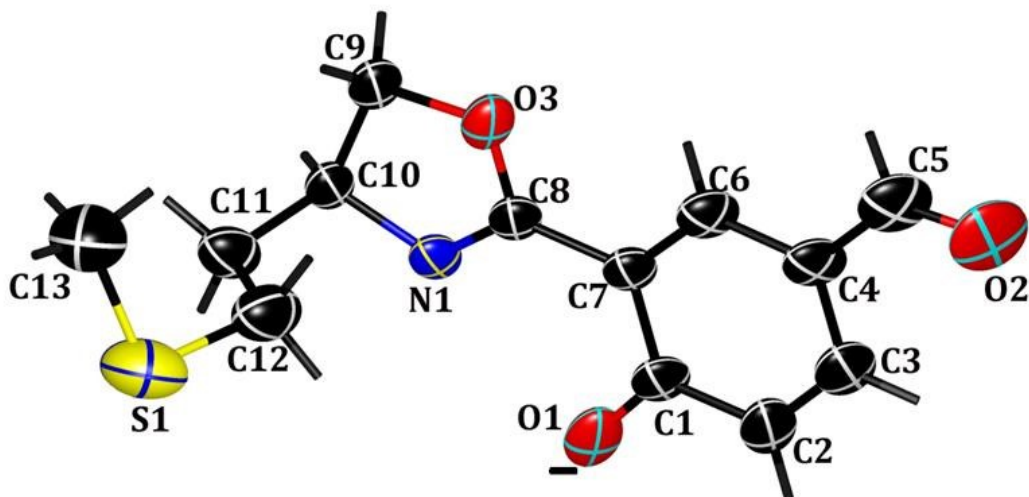

**Figure S1** The structure of anion ligand (C<sub>13</sub>H<sub>14</sub>NO<sub>3</sub>S)<sup>-</sup> in the complex [Cu(C<sub>13</sub>H<sub>14</sub>NO<sub>3</sub>S)<sub>2</sub>]<sub>2</sub>.

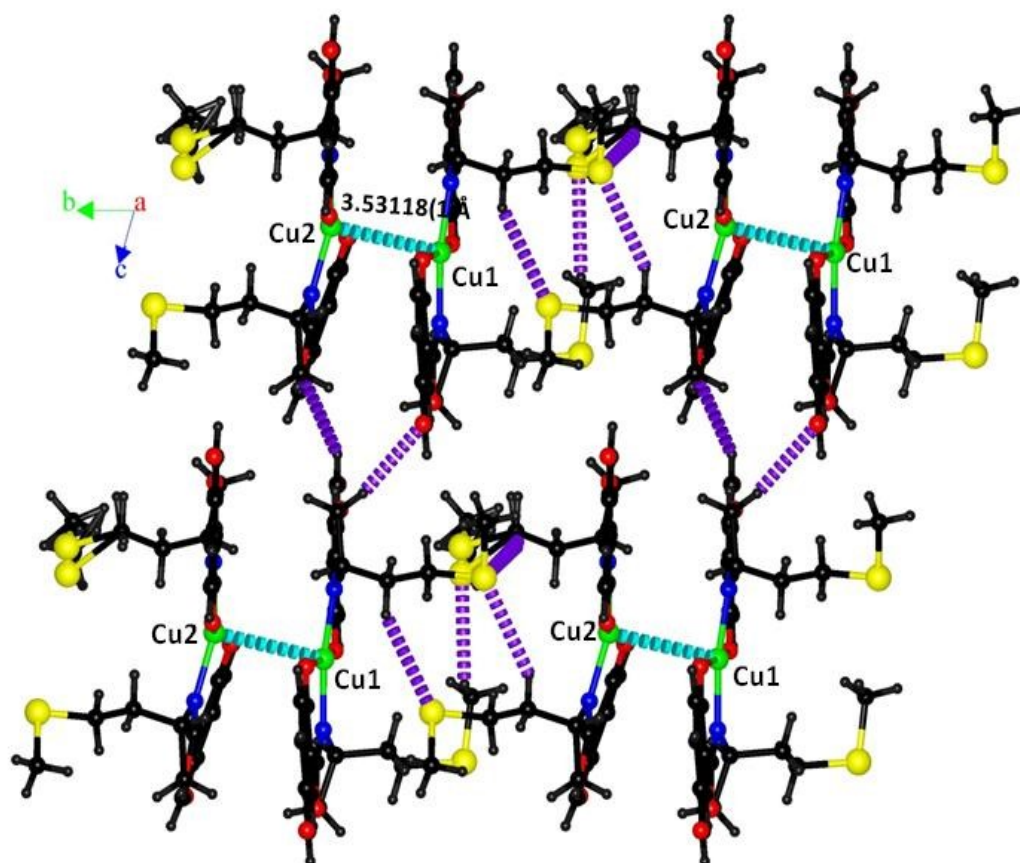

**Figure S2** Stacking diagram of complexes in *bc* plane. The distance between Cu1 and Cu2 is 3.53118(1) Å, and the purple dotted line represents hydrogen bonding.

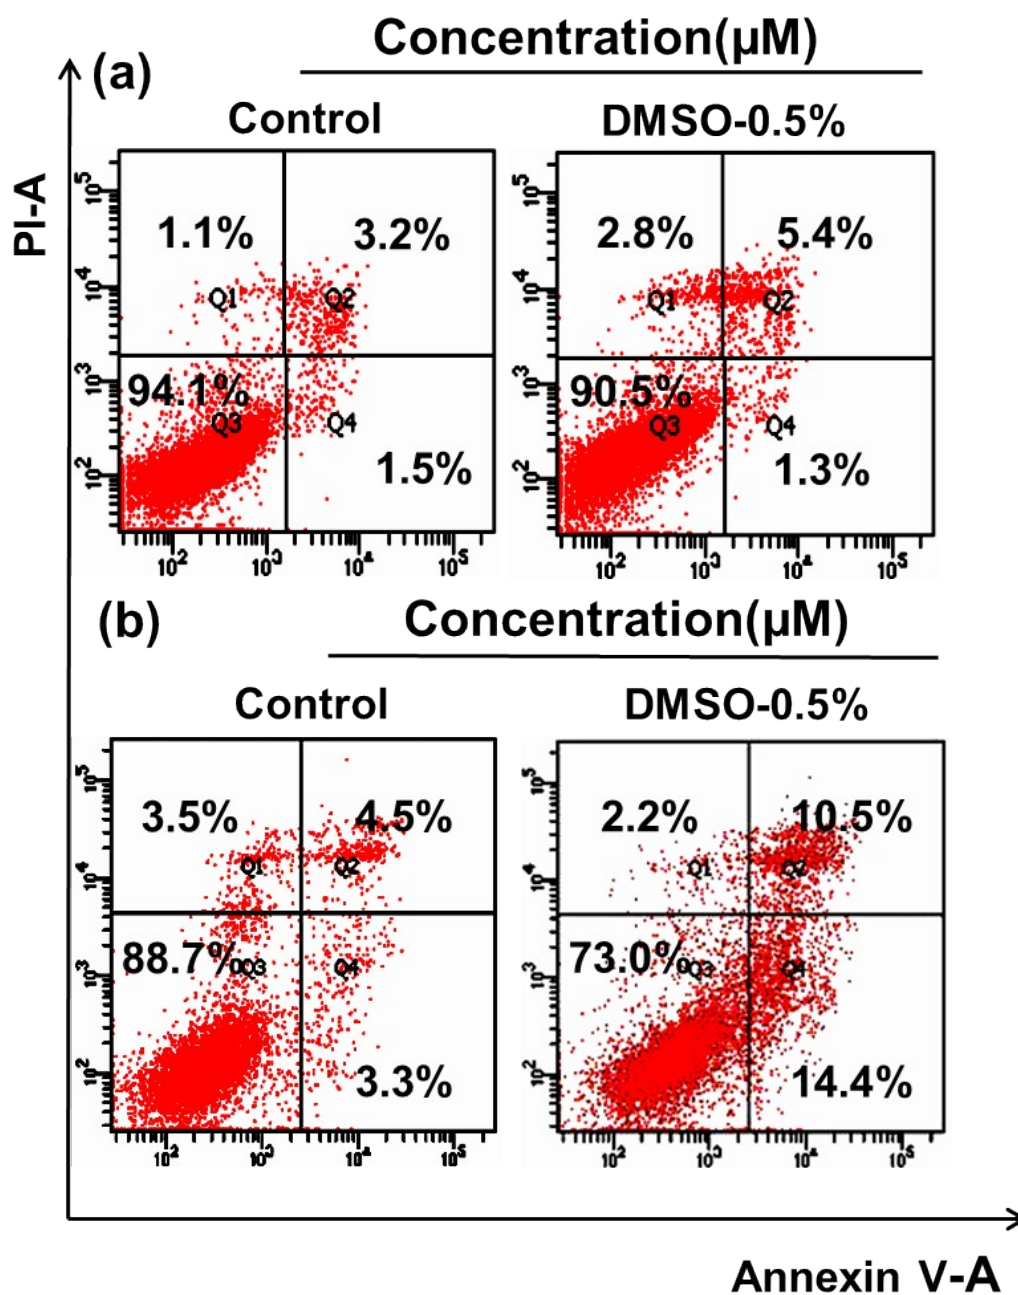

**Figure S3** SKOV3 cells (a) and HUVECs (b) were treated with the solvent used at the maximum concentration of  $[\text{Cu}(\text{C}_{13}\text{H}_{14}\text{NO}_3\text{S})_2]_2$  (DMSO-0.5%) for 27h, respectively, cells were stained with annexin V/PI and were analyzed by flow cytometry for detecting apoptosis and injury.

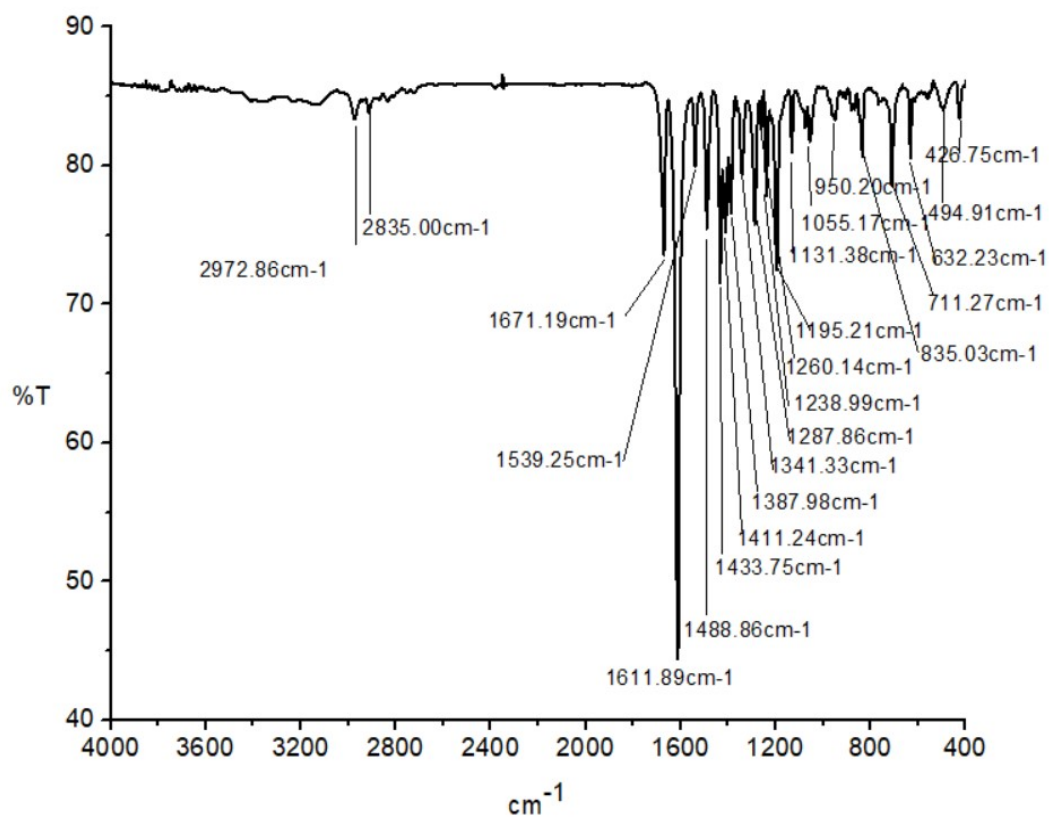

**Figure S4** FT-IR of  $[\text{Cu}(\text{C}_{13}\text{H}_{14}\text{NO}_3\text{S})_2]_2$ .
